# Supplementary material for: LAP-MALDI MS coupled with machine learning: an ambient mass spectrometry approach for high-throughput diagnostics
Source: Royal Society of Chemistry journal article supplement (doi:10.1039/d1sc05171g), 2022-01-01
Supplement: d1sc05171g2.pdf [file d1sc05171g2.pdf]

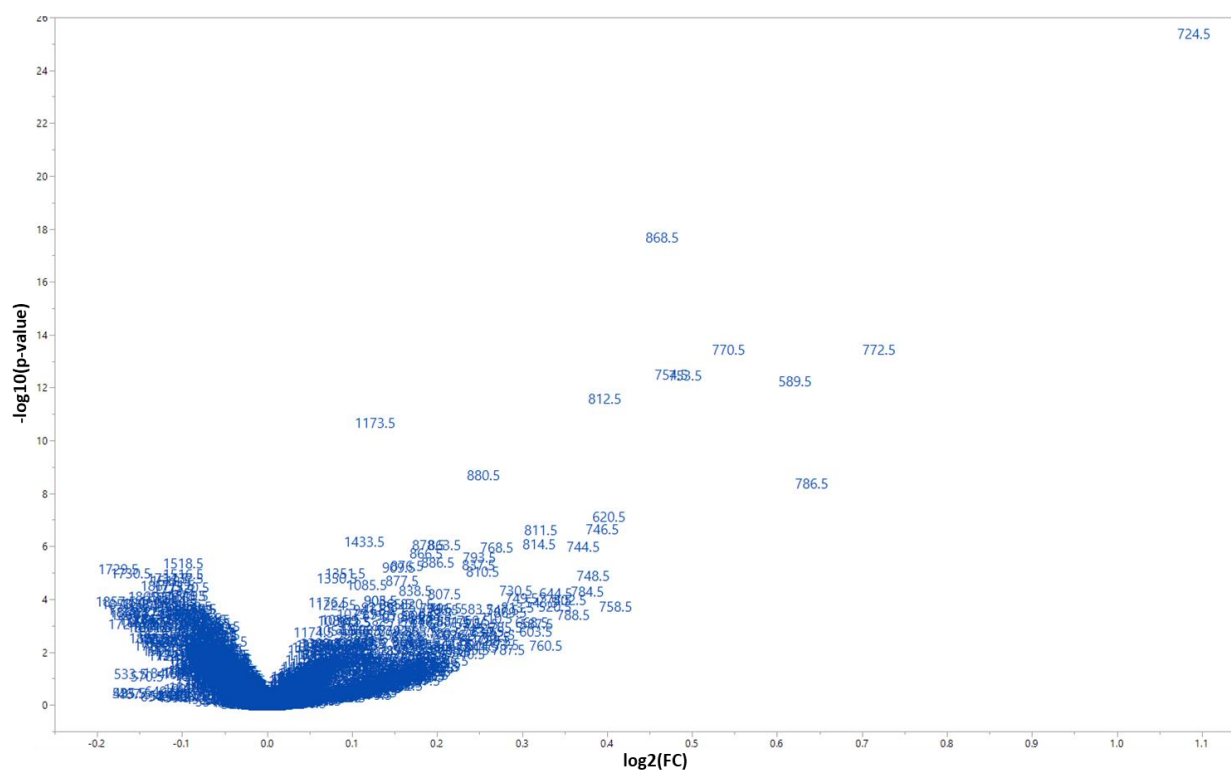

**Supplementary Figure 1:** Volcano plot representing the differential intensity of the mass bins as used for the pre-clinical mastitis detection. The fold change (FC) values and the p-values represent the comparisons of the relative intensities of each labelled mass bin between the control samples (ISCC and hSCC) and the pre-clinical mastitis samples collected up to 48 hours before the clinical event.

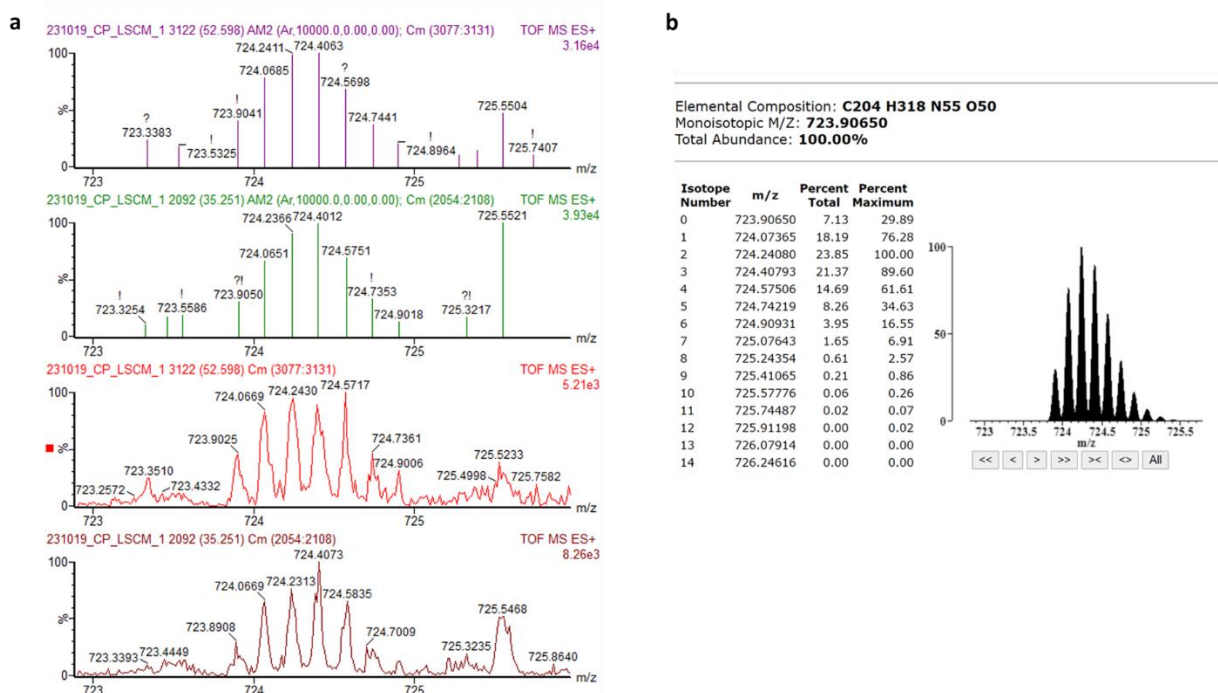

**Supplementary Figure 2:** The first isotopologue ion signal of the  $[M+6H]^{6+}$  isracidin-containing peptide ion (RPKHPIKHQGLPQEVLENLLRFFVAPFPEVFGKEKV; bovine alpha-S1-casein) is recorded at  $m/z$  723.9 with an accuracy of  $<5\text{ppm}$ . **a.** Mass spectral raw data of two mastitis samples showing the isotopologue distribution of the  $[M+6H]^{6+}$  isracidin-containing peptide ion (bottom two panels) and their corresponding centroided data (top two panels). **b.** Theoretical isotopologue distribution of the  $[M+6H]^{6+}$  isracidin-containing peptide ion as obtained by the MS-Isotope function within ProteinProspector (prospector.ucsf.edu).
