# Supplementary material for: LAP-MALDI MS coupled with machine learning: an ambient mass spectrometry approach for high-throughput diagnostics
Source: Royal Society of Chemistry journal article supplement (doi:10.1039/d1sc05171g), 2022-01-01
Supplement: d1sc05171g6.pdf [file d1sc05171g6.pdf]

| <b>Cost estimation for early bovine mastitis detection using LAP-MALDI MS based on approximately 10 million samples per year (3 sec / sample; 300 plates / day)</b> |                                        |                                                                                                       |                            |
|---------------------------------------------------------------------------------------------------------------------------------------------------------------------|----------------------------------------|-------------------------------------------------------------------------------------------------------|----------------------------|
|                                                                                                                                                                     | <u>Task</u>                            | <u>Resources</u>                                                                                      | <u>Cost per sample (¢)</u> |
| <b>Staff</b>                                                                                                                                                        |                                        |                                                                                                       |                            |
|                                                                                                                                                                     | All lab work, including data provision | 3x 0.5 FTE (\$75,000/year)                                                                            | 0.75                       |
|                                                                                                                                                                     | Sample transportation*                 | 2x 0.3 FTE (\$20,000/year)                                                                            | 0.2                        |
|                                                                                                                                                                     |                                        | <u>Subtotal</u>                                                                                       | <u>0.95</u>                |
| <b>Instrumentation</b>                                                                                                                                              |                                        |                                                                                                       |                            |
|                                                                                                                                                                     | Sample collection                      | Automatically by milking parlour**                                                                    | 0                          |
|                                                                                                                                                                     | Robotic sample preparation             | 2x 96-head liquid handler platforms (\$50,000; 5 years depreciation) plus service contract (10%/year) | 0.3                        |
|                                                                                                                                                                     | Other sample preparation               | Various instruments (balance, sonicator, centrifuge, shaker, ...; \$10,000/year)                      | 0.1                        |
|                                                                                                                                                                     | LAP-MALDI MS analysis                  | 1x LAP-MALDI Q-TOF instrument (\$180,000; 5 years depreciation) plus service contract (10%/year)      | 0.54                       |
|                                                                                                                                                                     |                                        | <u>Subtotal</u>                                                                                       | <u>0.94</u>                |
| <b>Other resources</b>                                                                                                                                              |                                        |                                                                                                       |                            |
|                                                                                                                                                                     | Office and lab space                   | 50sqm adequately furnished with power                                                                 | 0.1                        |
|                                                                                                                                                                     | IT and communication                   | Data mining/dissemination (\$5000/year)                                                               | 0.05                       |
|                                                                                                                                                                     | Sample collection by milking parlour   | Microtiter plate and barcoding (\$50/100)                                                             | 0.5                        |
|                                                                                                                                                                     | Sample transportation*                 | Non-staff transportation cost, including fuel (\$15,000/year)                                         | 0.15                       |
|                                                                                                                                                                     | Sample plate cleaning                  | Methanol / Deionised water                                                                            | <0.1                       |
|                                                                                                                                                                     | LSM bulk preparation                   | 10uL LSM (\$100/L), prepared in bulk quantities, e.g. 0.5L once a week                                | 0.1                        |
| <i>Analyte extraction</i>                                                                                                                                           | TCA precipitation                      | 100uL Water (<\$5/L)                                                                                  | <0.05                      |
|                                                                                                                                                                     |                                        | 11mg TCA (\$30/kg)                                                                                    | 0.03                       |
|                                                                                                                                                                     |                                        | 1x 100-uL pipette tip                                                                                 | 1                          |
|                                                                                                                                                                     | Pellet solubilisation                  | <100uL H <sub>2</sub> O/IPA/ACN (<\$20/L)                                                             | <0.2                       |
|                                                                                                                                                                     |                                        | 1x 100-uL pipette tip                                                                                 | 1                          |
| <i>MALDI sample preparation</i>                                                                                                                                     |                                        | Microtiter plate and barcoding (\$50/100)                                                             | 0.5                        |
|                                                                                                                                                                     | LSM distribution                       | <500 tips per day                                                                                     | <0.02                      |
|                                                                                                                                                                     | Analyte solution distribution          | Same pipette tip used for pellet solubilisation                                                       | 0                          |
|                                                                                                                                                                     | Mixing of LSM and analyte solution     | Same pipette tip used for pellet solubilisation                                                       | 0                          |
|                                                                                                                                                                     | MALDI sample spotting                  | 1x 10-uL pipette tip                                                                                  | 1                          |
|                                                                                                                                                                     |                                        | <u>Subtotal</u>                                                                                       | <u>&lt;4.8</u>             |
| <b>Total</b>                                                                                                                                                        |                                        |                                                                                                       | <b>&lt;6.69</b>            |

\* Farm-site collection once daily after morning milking (up to 30,000 samples each day from approximately 10-20 local farms; total travel of max. 100-150 miles per day); \*\* The option to collect small amounts of milk samples on a commercial milking parlour is becoming more available. However, if this option needs to be added it is estimated that the associated capital/maintenance costs add 1-2¢ to the overall cost/sample.
